# Supplementary material
Source: Research Square preprint supplement (doi:10.21203/rs.3.rs-8618673/v1)
Supplement: Supplementary file 1 [file 08be2b798384da544084d3ea.docx]

**Table 2. Morphological growth traits of collected accession of wild ber from Kachchh district, Gujarat**

| **Genotype** | **Plant height (cm)** | **No. of branches / plant** | **Plant spread (N-S) (cm)** | **Plant spread (E-W) (cm)** | **Stem girth (mm)** | **fruit length (mm)** | **Fruit width (mm)** | **Leaf area (cm2)** | **fruit wt (5 fruits)** | **TSS** | **Size Index (L×W)** | **Shape Index (L/W)** | **Roundness (%)** | **Volume (mm³)** | **Surface Area (mm²)** | **Test weight** |
| --- | --- | --- | --- | --- | --- | --- | --- | --- | --- | --- | --- | --- | --- | --- | --- | --- |
| **Ber_Bhuj_1** | 144.00 | 9.00 | 132.00 | 147.00 | 84.73 | 9.51 | 9.97 | 6.50 | 2.56 | 4.90 | 94.84 | 0.95 | 95.45 | 494.6 | 312.2 | 512.00 |
| **Ber_Bhuj_2** | 265.00 | 11.00 | 200.00 | 265.00 | 68.87 | 8.29 | 8.77 | 3.04 | 1.54 | 7.50 | 72.75 | 0.95 | 94.55 | 353.2 | 281.4 | 308.00 |
| **Ber_Bhuj_3** | 168.00 | 6.00 | 185.00 | 218.00 | 43.33 | 9.99 | 10.01 | 4.40 | 2.29 | 3.40 | 99.9 | 1 | 99.8 | 523.6 | 316.8 | 458.00 |
| **Ber_Nakh_4** | 230.00 | 5.00 | 358.00 | 427.00 | 49.42 | 10.20 | 10.16 | 4.82 | 3.12 | 6.20 | 103.63 | 1 | 99.61 | 553.3 | 322.5 | 624.00 |
| **Ber_Mand_5** | 203.00 | 3.00 | 410.00 | 330.00 | 67.35 | 10.48 | 10.73 | 5.11 | 3.40 | 10.70 | 112.45 | 0.98 | 97.61 | 633.3 | 336.7 | 680.00 |
| **Ber_Mand_6** | 275.00 | 6.00 | 328.00 | 205.00 | 41.68 | 11.12 | 11.82 | 4.20 | 3.01 | 6.70 | 131.43 | 0.94 | 94.06 | 768.2 | 362.9 | 602.00 |
| **Ber_Mand_7** | 215.00 | 3.00 | 265.00 | 190.00 | 65.26 | 11.76 | 11.94 | 6.55 | 4.00 | 6.00 | 140.43 | 0.99 | 98.49 | 837.3 | 373.4 | 800.00 |
| **Ber_Mand_8** | 255.00 | 2.00 | 298.00 | 280.00 | 66.76 | 10.84 | 11.36 | 6.78 | 2.90 | 8.40 | 123.14 | 0.95 | 95.59 | 682.1 | 349.2 | 580.00 |
| **Ber_Bhuj_9** | 171.00 | 3.00 | 215.00 | 205.00 | 42.89 | 9.99 | 10.24 | 5.16 | 2.60 | 4.90 | 102.38 | 0.98 | 97.56 | 548.3 | 319.4 | 520.00 |
| **Ber_Bhuj_10** | 213.00 | 3.00 | 321.00 | 214.00 | 56.10 | 8.99 | 9.96 | 3.98 | 2.29 | 7.00 | 89.55 | 0.9 | 90.26 | 446.8 | 297.6 | 458.00 |
| **Ber_Bhuj_11** | 172.00 | 5.00 | 254.00 | 344.00 | 50.29 | 11.62 | 11.67 | 9.34 | 3.02 | 7.00 | 135.56 | 1 | 99.57 | 823.1 | 370.2 | 604.00 |
| **Ber_Bhuj_12** | 255.00 | 2.00 | 342.00 | 229.00 | 89.70 | 11.34 | 12.17 | 3.50 | 3.03 | 5.70 | 137.99 | 0.93 | 93.45 | 849.7 | 376.5 | 606.00 |
| **Ber_Nakh_13** | 220.00 | 11.00 | 360.00 | 280.00 | 26.71 | 10.74 | 11.80 | 4.20 | 3.95 | 6.30 | 126.73 | 0.91 | 91.02 | 731.2 | 355.6 | 790.00 |
| **Ber_Nakh_14** | 182.50 | 8.00 | 320.00 | 241.00 | 27.51 | 10.68 | 10.27 | 8.72 | 3.19 | 7.10 | 109.7 | 1.04 | 96.16 | 586.3 | 328.1 | 638.00 |
| **Ber_Bhuj_15** | 204.00 | 11.00 | 229.00 | 215.00 | 18.27 | 9.39 | 9.45 | 1.38 | 2.10 | 4.90 | 88.73 | 0.99 | 99.36 | 470.2 | 305.1 | 420.00 |
| **Ber_Nakh_16** | 265.00 | 8.00 | 405.00 | 455.00 | 19.68 | 10.42 | 11.60 | 4.73 | 3.35 | 8.70 | 120.87 | 0.9 | 89.66 | 692.4 | 346.8 | 670.00 |
| **Ber_Bhuj_17** | 215.00 | 5.00 | 215.00 | 235.00 | 21.57 | 10.74 | 11.13 | 5.29 | 4.00 | 7.90 | 119.49 | 0.97 | 96.38 | 667.3 | 342.5 | 800.00 |
| **Ber_Bhuj_18** | 158.00 | 8.00 | 308.00 | 260.00 | 22.66 | 11.94 | 12.32 | 4.12 | 5.02 | 13.00 | 147.19 | 0.97 | 96.92 | 935.6 | 386.3 | 1004.00 |
| **Ber_Bhuj_19** | 262.00 | 20.00 | 340.00 | 390.00 | 46.62 | 11.21 | 10.62 | 3.93 | 3.11 | 6.80 | 119.04 | 1.06 | 94.66 | 627.2 | 340.1 | 622.00 |
| **Ber_Abda_20** | 265.00 | 20.00 | 465.00 | 540.00 | 41.42 | 13.05 | 14.73 | 6.60 | 7.48 | 14.50 | 192.2 | 0.89 | 89 | 1332.1 | 432.7 | 1496.00 |
| **Ber_Bhuj_21** | 350.00 | 15.00 | 483.00 | 384.00 | 117.55 | 10.36 | 11.48 | 5.74 | 3.48 | 17.50 | 118.89 | 0.9 | 90.7 | 663.4 | 341.7 | 696.00 |
| **Ber_Nakh_22** | 345.00 | 10.00 | 510.00 | 505.00 | 65.13 | 11.67 | 11.97 | 5.32 | 3.73 | 12.50 | 139.65 | 0.97 | 96.92 | 851.2 | 375.2 | 746.00 |
| **Ber_Bhuj_23** | 315.00 | 2.00 | 265.00 | 372.00 | 55.23 | 9.84 | 10.66 | 4.13 | 2.47 | 7.70 | 104.89 | 0.92 | 92.32 | 562.3 | 324.6 | 494.00 |
| **Ber_Bhuj_24** | 440.00 | 13.00 | 510.00 | 490.00 | 32.60 | 12.03 | 13.40 | 9.76 | 4.23 | 8.20 | 161.2 | 0.9 | 90 | 1072.3 | 408.3 | 846.00 |
| **Ber_Bhuj_25** | 256.00 | 4.00 | 303.00 | 206.00 | 64.83 | 9.60 | 12.14 | 3.50 | 4.08 | 11.70 | 116.54 | 0.79 | 79 | 589.2 | 333.6 | 816.00 |
| **Ber_Bhuj_26** | 244.00 | 6.00 | 220.00 | 190.00 | 50.81 | 9.91 | 10.69 | 4.20 | 2.88 | 7.50 | 106 | 0.93 | 92.7 | 570.3 | 326.1 | 576.00 |
| **Ber_Bhuj_27** | 354.00 | 6.00 | 320.00 | 290.00 | 33.26 | 11.19 | 11.10 | 3.42 | 3.54 | 7.70 | 124.21 | 1.01 | 99.19 | 682.4 | 348.7 | 708.00 |
| **Ber_Nakh_28** | 223.00 | 10.00 | 331.00 | 336.00 | 19.13 | 12.81 | 12.07 | 2.29 | 3.98 | 10.10 | 154.32 | 1.06 | 94.23 | 895.3 | 390.2 | 796.00 |
| **Ber_Bhuj_29** | 338.00 | 12.00 | 490.00 | 500.00 | 110.10 | 10.67 | 12.25 | 6.71 | 3.79 | 13.00 | 130.78 | 0.87 | 87.1 | 752.1 | 358.9 | 758.00 |
| **Ber_Bhuj_30** | 455.00 | 15.00 | 525.00 | 500.00 | 106.96 | 9.84 | 11.67 | 5.83 | 3.76 | 10.00 | 114.84 | 0.84 | 84.29 | 598.2 | 330.4 | 752.00 |
