# Supplementary material
Source: Research Square preprint supplement (doi:10.21203/rs.3.rs-8618673/v1)
Supplement: Supplementary file 2 [file 3f9e99de7b840be025a74e37.docx]

| Genotypes | longitude (N) | Latitude (W) | village | Taluka | District | Country |
| --- | --- | --- | --- | --- | --- | --- |
| Br_Bhuj_1 | 23.22797 | 69.76103 | Bharasar | Bhuj | Kutch | India |
| Br_Bhuj_2 | 23.09570 | 69.35290 | Sekhpeer | Bhuj | Kutch | India |
| Br_Bhuj_3 | 23.09600 | 69.35500 | Naranpar | Bhuj | Kutch | India |
| Br_Nakh_4 | 23.18178 | 69.72455 | Madhapar | Bhuj | Kutch | India |
| Br_Mand_5 | 23.06290 | 69.32380 | Jakhkh | Mandvi | Kutch | India |
| Br_Mand_6 | 23.06280 | 69.32380 | Godhapar | Mandvi | Kutch | India |
| Br_Mand_7 | 23.03470 | 69.30000 | Dhonai nursary | Mandvi | Kutch | India |
| Br_Mand_8 | 23.56288 | 70.71563 | Pragpar | Rapar | Kutch | India |
| Br_Bhuj_9 | 23.47037 | 70.65121 | Chitrod | Rapar | Kutch | India |
| Br_Bhuj_10 | 23.13953 | 69.78845 | Nana Reha | Bhuj | Kutch | India |
| Br_Bhuj_11 | 23.05340 | 69.33040 | Dahisara | Bhuj | Kutch | India |
| Br_Bhuj_12 | 23.17530 | 69.63880 | Bharapar | Bhuj | Kutch | India |
| Br_Nakh_13 | 23.26340 | 69.39420 | Lakshmipur | Nakhatrana | Kutch | India |
| Br_Nakh_14 | 23.23580 | 69.40630 | Manjal | Nakhatrana | Kutch | India |
| Br_Bhuj_15 | 23.33581 | 70.35354 | Lodeshwar | Bhachau | Kutch | India |
| Br_Nakh_16 | 23.52200 | 69.43370 | Kharadiya | Nakhatrana | Kutch | India |
| Br_Bhuj_17 | 23.52450 | 69.43380 | Kaladunger | Bhuj | Kutch | India |
| Br_Bhuj_18 | 23.53480 | 69.43410 | Motadinara | Bhuj | Kutch | India |
| Br_Bhuj_19 | 23.46450 | 69.29321 | Moti Aral | Nakhatrana | Kutch | India |
| Br_Abda_20 | 23.54430 | 69.44100 | Nagadiya | Abdasa | Kutch | India |
| Br_Bhuj_21 | 23.54440 | 69.44130 | Bhagadia | Bhuj | Kutch | India |
| Br_Nakh_22 | 23.54440 | 69.44130 | Kharadiya | Nakhatrana | Kutch | India |
| Br_Bhuj_23 | 23.45012 | 69.29322 | Dhinodhar | Nakhatrana | Kutch | India |
| Br_Bhuj_24 | 23.55120 | 69.46140 | Kaladunger | Bhuj | Kutch | India |
| Br_Bhuj_25 | 23.55370 | 69.48170 | Kaladunger, Khavda | Bhuj | Kutch | India |
| Br_Bhuj_26 | 23.55260 | 69.47490 | Kaladunger, Khavda | Bhuj | Kutch | India |
| Br_Bhuj_27 | 23.55110 | 69.45100 | Kaladunger, Khavda | Bhuj | Kutch | India |
| Br_Nakh_28 | 23.54300 | 69.44030 | Chhari Dhandh | Nakhtrana | Kutch | India |
| Br_Nakh_29 | 23.68810 | 69.20515 | Hajipir | Nakhtrana | Kutch | India |
| Br_Nakh_30 | 23.49650 | 69.33480 | Jalu | Nakhtrana | Kutch | India |
