# Supplementary material
Source: Research Square preprint supplement (doi:10.21203/rs.3.rs-8618673/v1)
Supplement: Supplementary file 3 [file a6d6921aa6154716e848ad57.docx]

| Trait / Statistic | PC1 | PC2 | PC3 | PC4 | PC5 | PC6 | PC7 | PC8 | PC9 |
| --- | --- | --- | --- | --- | --- | --- | --- | --- | --- |
| **Eigenvalue** | 8.817 | 3.605 | 1.515 | 1.107 | 0.753 | 0.659 | 0.435 | 0.212 | 0.200 |
| **Variance (%)** | 50.14 | 20.50 | 8.62 | 6.29 | 4.28 | 3.75 | 2.47 | 1.21 | 1.14 |
| Plant height (cm) | 0.185 | 0.343 | −0.231 | 0.009 | 0.042 | 0.074 | 0.162 | −0.430 | 0.438 |
| Plant spread (N‑S) (cm) | 0.273 | 0.219 | −0.198 | −0.018 | −0.225 | 0.198 | −0.249 | 0.136 | −0.290 |
| Plant spread (E‑W) (cm) | 0.252 | 0.181 | −0.359 | −0.085 | −0.300 | 0.120 | −0.326 | 0.534 | −0.155 |
| Canopy volume (m³) | 0.244 | 0.302 | −0.299 | 0.020 | −0.027 | −0.057 | −0.025 | −0.011 | 0.157 |
| No. of branches / plant | 0.179 | 0.118 | −0.257 | −0.476 | 0.082 | −0.236 | 0.486 | −0.083 | −0.073 |
| Stem girth (mm) | 0.032 | 0.365 | 0.051 | 0.374 | 0.141 | 0.346 | 0.461 | 0.296 | 0.095 |
| Fruit length (mm) | 0.258 | −0.319 | −0.124 | 0.048 | 0.026 | −0.080 | 0.148 | −0.104 | −0.183 |
| Fruit width (mm) | 0.321 | −0.090 | 0.191 | 0.105 | −0.108 | 0.147 | 0.121 | 0.024 | −0.074 |
| Leaf area (cm²) | 0.134 | −0.021 | −0.175 | 0.715 | −0.341 | 0.044 | −0.164 | −0.240 | −0.028 |
| Fruit weight (5 fruits) | 0.299 | −0.144 | 0.206 | −0.135 | 0.069 | 0.201 | −0.139 | 0.134 | 0.415 |
| TSS (°Brix) | 0.238 | 0.159 | 0.125 | −0.156 | −0.022 | −0.193 | −0.412 | −0.509 | −0.114 |
| Fruit size index (L×W) | 0.308 | −0.215 | 0.041 | 0.061 | −0.010 | 0.067 | 0.154 | −0.013 | −0.098 |
| Fruit shape index (L/W) | −0.113 | −0.354 | −0.497 | −0.109 | 0.483 | 0.509 | 0.039 | −0.172 | −0.107 |
| Fruit roundness (%) | −0.147 | −0.336 | −0.434 | 0.095 | 0.532 | −0.025 | −0.107 | 0.133 | 0.471 |
| Fruit volume (mm³) | 0.304 | −0.222 | 0.029 | 0.073 | 0.035 | 0.172 | 0.135 | 0.068 | −0.026 |
| Fruit surface area (mm²) | 0.299 | −0.229 | 0.015 | 0.099 | 0.020 | 0.135 | 0.170 | −0.027 | −0.144 |
| Fruit test weight (g) | 0.299 | −0.144 | 0.206 | −0.135 | 0.069 | 0.201 | −0.139 | 0.134 | 0.415 |
